# Supplementary material
Source: publisher figshare collection journal article supplement (https://acs.figshare.com/ndownloader/files/5137960)
Supplement: Supplementary file 1 [file 5137960]

data_153R_publ

_pd_block_id
  2004-10-01T09:36|153R|R.E.D.|Mar345

_audit_creation_method  "from EXP file using GSAS2CIF"
_audit_creation_date                   2004-10-01T09:36
_audit_author_name                     R.E.D.
_audit_update_record
; 2004-10-01T09:36  Initial CIF as created by GSAS2CIF
;

#==============================================================================

# 1. SUBMISSION DETAILS

_publ_contact_author                
;
	Robert Dinnebier
	Max-Planck f\"ur Festk\"orperforschung
	Heisenbergstrasse 1
	D-70569 Stuttgart
	Deutschland
;
_publ_contact_author_email          r.dinnebier@fkf.mpg.de
_publ_contact_author_fax            049 711 689-1503
_publ_contact_author_phone          049 711 689-1500
_publ_requested_journal             Inorganic Chemistry
;
_publ_section_title
 The effect of crystal packing on the structures of polymeric metallocenes
;

loop_
_publ_author_name
_publ_author_address
	�Dinnebier, Robert E.�
;	Max-Planck f\"ur Festk\"orperforschung
	Heisenbergstrasse 1
	D-70569 Stuttgart
	Deutschland
;
	�van Smaalen, Sander�
;	Laboratory of Crystallography
      University of Bayreuth
      D-95440 Bayreuth
	Deutschland
;
	�Olbrich, Falk�
;	Insitut f�r Anorganische und Angewandte Chemie
      Martin-Luther-King-Pl. 6
      D-20146 Hamburg
	Deutschland
;
	�Carlson, Stefan�
;	MAX-lab
      Lund University
      P.O. Box 118
      SE-22100 Lund
      Sweden.
;

#==============================================================================

# 2. PROCESSING SUMMARY (IUCr Office Use Only)

_journal_data_validation_number      ?

_journal_date_recd_electronic        ?
_journal_date_to_coeditor            ?
_journal_date_from_coeditor          ?
_journal_date_accepted               ?
_journal_date_printers_first         ?
_journal_date_printers_final         ?
_journal_date_proofs_out             ?
_journal_date_proofs_in              ?
_journal_coeditor_name               ?
_journal_coeditor_code               ?
_journal_coeditor_notes
; ?
;
_journal_techeditor_code             ?
_journal_techeditor_notes
; ?
;
_journal_coden_ASTM                  ?
_journal_name_full                   ?
_journal_year                        ?
_journal_volume                      ?
_journal_issue                       ?
_journal_page_first                  ?
_journal_page_last                   ?
_journal_paper_category              ?
_journal_suppl_publ_number           ?
_journal_suppl_publ_pages            ?

#==============================================================================

# 3. TITLE AND AUTHOR LIST

_publ_section_title
; ?
;
_publ_section_title_footnote
; ?
;

# The loop structure below should contain the names and addresses of all
# authors, in the required order of publication. Repeat as necessary.

loop_
	_publ_author_name
        _publ_author_footnote
	_publ_author_address
 ?                                   #<--'Last name, first name'
; ?
;
; ?
;

#==============================================================================

# 4. TEXT

_publ_section_synopsis
;  ?
;
_publ_section_abstract
; ?
;
_publ_section_comment
; ?
;
_publ_section_exptl_prep      # Details of the preparation of the sample(s)
                              # should be given here.
; ?
;
_publ_section_exptl_refinement
; ?
;
_publ_section_references
; ?
;
_publ_section_figure_captions
; ?
;
_publ_section_acknowledgements
; ?
;

#=============================================================================
# 5. OVERALL REFINEMENT & COMPUTING DETAILS

_refine_special_details
; ?
;
_pd_proc_ls_special_details
; ?
;

# The following items are used to identify the programs used.
_computing_molecular_graphics     ?
_computing_publication_material   ?

_refine_ls_weighting_scheme       ?
_refine_ls_weighting_details      ?
_refine_ls_hydrogen_treatment     ?
_refine_ls_extinction_method      ?
_refine_ls_extinction_coef        ?
_refine_ls_number_constraints     ?

_refine_ls_restrained_S_all       ?
_refine_ls_restrained_S_obs       ?

#==============================================================================
# 6. SAMPLE PREPARATION DATA

# (In the unusual case where multiple samples are used in a single
#  Rietveld study, this information should be moved into the phase
#  blocks)

# The following three fields describe the preparation of the material.
# The cooling rate is in K/min.  The pressure at which the sample was
# prepared is in kPa.  The temperature of preparation is in K.

_pd_prep_cool_rate                ?
_pd_prep_pressure                 ?
_pd_prep_temperature              ?

_pd_char_colour                   ?       # use ICDD colour descriptions
_refine_ls_shift/su_max                7.40
_refine_ls_shift/su_mean               2.32
_computing_structure_refinement        GSAS
_refine_ls_number_parameters           19
_refine_ls_goodness_of_fit_all         0.56
_refine_ls_number_restraints           0
_refine_ls_matrix_type                 full
#==============================================================================
# 7. CHEMICAL, STRUCTURAL AND CRYSTAL DATA

_pd_char_particle_morphology      ?

_chemical_name_systematic
; ?
;
_chemical_name_common             ?
_chemical_formula_moiety          ?
_chemical_formula_structural      ?
_chemical_formula_analytical      ?
_chemical_melting_point           ?
_chemical_compound_source         ?       # for minerals and
                                          # natural products
_symmetry_space_group_name_Hall   ?

_exptl_crystal_F_000               ?
_exptl_crystal_density_diffrn      ?
_exptl_crystal_density_meas        ?
_exptl_crystal_density_method      ?

_cell_measurement_temperature     ?

_cell_special_details
; ?
;

_geom_special_details             ?

# The following item identifies the program(s) used (if appropriate).
_computing_structure_solution     ?

#==============================================================================

# 8. Phase information from GSAS

_pd_phase_name                         KCP
_cell_length_a                         9.4233(7)
_cell_length_b                         9.4233
_cell_length_c                         10.0338(15)
_cell_angle_alpha                      90.0
_cell_angle_beta                       90.0
_cell_angle_gamma                      90.0
_cell_volume                           890.99(17)
_symmetry_cell_setting                 tetragonal
_symmetry_space_group_name_H-M         "P -4 21 c"
loop_ _symmetry_equiv_pos_site_id _symmetry_equiv_pos_as_xyz
       1 +x,+y,+z 
       2 +y,-x,-z 
       3 -x,-y,+z 
       4 -y,+x,-z 
       5 -x+1/2,+y+1/2,-z+1/2 
       6 +y+1/2,+x+1/2,+z+1/2 
       7 +x+1/2,-y+1/2,-z+1/2 
       8 -y+1/2,-x+1/2,+z+1/2 

# ATOMIC COORDINATES AND DISPLACEMENT PARAMETERS


loop_
      _atom_site_type_symbol
      _atom_site_label
      _atom_site_fract_x
      _atom_site_fract_y
      _atom_site_fract_z
      _atom_site_occupancy
      _atom_site_thermal_displace_type
      _atom_site_U_iso_or_equiv
      _atom_site_symmetry_multiplicity
K 
K       0.7988(9)    0.1257(7)    0.8750(11)   1.0        Uani   0.08809       8
C 
C1      0.8170(23)   0.168(4)     0.5857(22)   1.0        Uiso   0.016(5)      8
C 
C2      0.7860(29)   0.3064(26)   0.6341(31)   1.0        Uiso   0.016(5)      8
C 
C3      0.6419(35)   0.3085(25)   0.6754(17)   1.0        Uiso   0.016(5)      8
C 
C4      0.5838(18)   0.172(4)     0.6526(31)   1.0        Uiso   0.016(5)      8
C 
C5      0.692(4)     0.0849(11)   0.5971(28)   1.0        Uiso   0.016(5)      8
H 
H1      0.915(4)     0.134(7)     0.5481(30)   1.0        Uiso   0.01          8
H 
H2      0.857(5)     0.392(5)     0.639(5)     1.0        Uiso   0.01          8
H 
H3      0.588(6)     0.396(4)     0.7157(19)   1.0        Uiso   0.01          8
H 
H4      0.4792(24)   0.140(7)     0.673(5)     1.0        Uiso   0.01          8
H 
H5      0.682(8)    -0.0220(13)   0.569(4)     1.0        Uiso   0.01          8

loop_ _atom_site_aniso_label
      _atom_site_aniso_U_11
      _atom_site_aniso_U_12
      _atom_site_aniso_U_13
      _atom_site_aniso_U_22
      _atom_site_aniso_U_23
      _atom_site_aniso_U_33
K       0.174(15)   -0.020(10)    0.076(15)    0.095(11)   -0.021(12)   -0.004(4)   
 
# If you change Z, be sure to change all 3 of the following
_chemical_formula_sum                  "C5 H5 K"
_chemical_formula_weight               104.20
_cell_formula_units_Z                  8

# MOLECULAR GEOMETRY

loop_
      _geom_bond_atom_site_label_1
      _geom_bond_atom_site_label_2
      _geom_bond_distance
      _geom_bond_site_symmetry_1
      _geom_bond_site_symmetry_2
      _geom_bond_publ_flag
   ?   ?   ?   ?   ?   ?

loop_
      _geom_angle_atom_site_label_1
      _geom_angle_atom_site_label_2
      _geom_angle_atom_site_label_3
      _geom_angle
      _geom_angle_site_symmetry_1
      _geom_angle_site_symmetry_2
      _geom_angle_site_symmetry_3
      _geom_angle_publ_flag
   ?   ?   ?   ?   ?   ?   ?   ?

# Powder diffraction data for histogram  1
#==============================================================================
# 9. INSTRUMENT CHARACTERIZATION

_exptl_special_details
; ?
;

# if regions of the data are excluded, the reason(s) are supplied here:
_pd_proc_info_excluded_regions
; ?
;

# The following item is used to identify the equipment used to record
# the powder pattern when the diffractogram was measured at a laboratory
# other than the authors' home institution, e.g. when neutron or synchrotron
# radiation is used.

_pd_instr_location
; ?
;
_pd_calibration_special_details           # description of the method used
                                          # to calibrate the instrument
; ?
;

_diffrn_ambient_temperature       ?
_diffrn_source                    ?
_diffrn_source_target             ?
_diffrn_source_type               ?
_diffrn_measurement_device_type   ?
_diffrn_detector                  ?
_diffrn_detector_type             ?       # make or model of detector

_pd_meas_scan_method              ?       # options are 'step', 'cont',
                                          # 'tof', 'fixed' or
                                          # 'disp' (= dispersive)
_pd_meas_special_details
;  ?
;

# The following two items identify the program(s) used (if appropriate).
_computing_data_collection        ?
_computing_data_reduction         ?

# Describe any processing performed on the data, prior to refinement.
# For example: a manual Lp correction or a precomputed absorption correction
_pd_proc_info_data_reduction      ?

# The following item is used for angular dispersive measurements only.

_diffrn_radiation_monochromator   ?

# The following items are used to define the size of the instrument.
# Not all distances are appropriate for all instrument types.

_pd_instr_dist_src/mono           ?
_pd_instr_dist_mono/spec          ?
_pd_instr_dist_src/spec           ?
_pd_instr_dist_spec/anal          ?
_pd_instr_dist_anal/detc          ?
_pd_instr_dist_spec/detc          ?

# 10. Specimen size and mounting information

# The next three fields give the specimen dimensions in mm.  The equatorial
# plane contains the incident and diffracted beam.

_pd_spec_size_axial               ?       # perpendicular to
                                          # equatorial plane

_pd_spec_size_equat               ?       # parallel to
                                          # scattering vector
                                          # in transmission

_pd_spec_size_thick               ?       # parallel to
                                          # scattering vector
                                          # in reflection

_pd_spec_mounting                         # This field should be
                                          # used to give details of the
                                          # container.
; ?
;

_pd_spec_mount_mode               ?       # options are 'reflection'
                                          # or 'transmission'

_pd_spec_shape                    ?       # options are 'cylinder'
                                          # 'flat_sheet' or 'irregular'


loop_ _atom_type_symbol
      _atom_type_number_in_cell
      _atom_type_scat_dispersion_real
      _atom_type_scat_dispersion_imag
      _atom_type_scat_Cromer_Mann_a1
      _atom_type_scat_Cromer_Mann_a2
      _atom_type_scat_Cromer_Mann_a3
      _atom_type_scat_Cromer_Mann_a4
      _atom_type_scat_Cromer_Mann_b1
      _atom_type_scat_Cromer_Mann_b2
      _atom_type_scat_Cromer_Mann_b3
      _atom_type_scat_Cromer_Mann_b4
      _atom_type_scat_Cromer_Mann_c
      _atom_type_scat_source
  K          8.0    0.000    0.000
 8.21860 12.7949 7.43980 0.77480 1.05190 213.187 0.86590 41.6841 1.42280 
  International_Tables_Vol_C
  C         40.0    0.000    0.000
 2.31000 20.8439 1.02000 10.2075 1.58860 0.56870 0.86500 51.6512 0.21560 
  International_Tables_Vol_C
  H         40.0    0.000    0.000
 0.49300 10.5109 0.32291 26.1257 0.14019 3.14236 0.04081 57.7997 0.00304 
  International_Tables_Vol_C
_diffrn_radiation_probe                x-ray
_diffrn_radiation_polarisn_ratio       0.0
_diffrn_radiation_wavelength           0.431329
_diffrn_radiation_type                 ?
_pd_proc_ls_prof_R_factor              0.0097
_pd_proc_ls_prof_wR_factor             0.0125
_pd_proc_ls_prof_wR_expected           0.0224
_refine_ls_R_Fsqd_factor               0.37391

_pd_proc_ls_background_function
;   GSAS Background function number 1 with  1 terms.
 Shifted Chebyshev function of 1st kind
      1:    0.00000    
;

_exptl_absorpt_process_details
;   GSAS Absorption/surface roughness correction: function number 0
 No correction is applied.
;
_exptl_absorpt_correction_T_min        1.00000
_exptl_absorpt_correction_T_max        1.00000
# Extinction correction
_gsas_exptl_extinct_corr_T_min         1.00000
_gsas_exptl_extinct_corr_T_max         1.00000

_pd_proc_ls_profile_function
;
 CW Profile function number 2 with  18 terms
 Profile coefficients for Simpson's rule integration of pseudovoigt function
 C.J. Howard (1982). J. Appl. Cryst.,15,615-620.
 P. Thompson, D.E. Cox & J.B. Hastings (1987). J. Appl. Cryst.,20,79-83.
 #1(GU)   = 8037.130 #2(GV)   =    0.000 #3(GW)   =    0.000
 #4(LX)   =    4.663 #5(LY)   =    0.000 #6(trns) =    0.000
 #7(asym) =   0.0000 #8(shft) =   0.0000 #9(GP)   =    0.000
 #10(stec)=     0.00 #11(ptec)=     0.00 #12(sfec)=     0.00
 #13(L11) =    0.000 #14(L22) =    0.000 #15(L33) =    0.000
 #16(L12) =    0.000 #17(L13) =    0.000 #18(L23) =    0.000
 Peak tails are ignored  where the intensity is below 0.0020 times the peak
   Aniso. broadening axis   0.0   0.0   1.0
;
_pd_proc_ls_peak_cutoff 0.00200
_pd_proc_info_datetime                 2004-10-01T09:36:09
_pd_calc_method                        "Rietveld Refinement"

#---- raw/calc data loop -----
_pd_meas_2theta_range_min              2.9
_pd_meas_2theta_range_max              19.69119
_pd_meas_2theta_range_inc              0.01375
_pd_proc_2theta_range_min              2.9
_pd_proc_2theta_range_max              19.69119
_pd_proc_2theta_range_inc              0.01375

loop_
      _pd_meas_counts_total
      _pd_proc_ls_weight
      _pd_proc_intensity_bkg_calc
      _pd_calc_intensity_total
  1718.0   .            .            .
  1729.0    0.0002902   1716.94458    3.29806
  1737.0    0.0002887   1726.97937    3.43352
  1745.0    0.0002873   1737.01367    3.57747
  1755.0    0.0002856   1747.04822    3.73067
  1763.0    0.0002842   1757.08276    3.89390
  1772.0    0.0002826   1767.11755    4.06808
  1781.0    0.0002811   1777.15186    4.25418
  1789.0    0.0002797   1787.18652    4.45334
  1799.0    0.0002781   1797.22131    4.66679
  1808.0    0.0002767   1807.25574    4.89594
  1814.0    0.0002754   1817.29016    5.14235
  1821.0    0.0002741   1827.32483    5.40781
  1830.0    0.0002727   1837.35962    5.69433
  1839.0    0.0002713   1847.39392    6.00418
  1849.0    0.0002698   1857.42834    6.33996
  1858.0    0.0002684   1867.25049    6.70465
  1866.0    0.0002673   1874.45227    7.10165
  1874.0    0.0002663   1881.65381    7.53487
  1882.0    0.0002652   1888.85559    8.00886
  1892.0    0.0002640   1896.05725    8.52887
  1900.0    0.0002630   1903.25891    9.10102
  1908.0    0.0002619   1910.46057    9.73250
  1916.0    0.0002609   1917.66235   10.43180
  1924.0    0.0002599   1924.86401   11.20890
  1929.0    0.0002590   1932.06567   12.07572
  1935.0    0.0002582   1939.26721   13.04655
  1942.0    0.0002572   1946.46912   14.13867
  1952.0    0.0002561   1953.67065   15.37289
  1959.0    0.0002552   1960.87231   16.77486
  1964.0    0.0002544   1968.07410   18.37615
  1972.0    0.0002534   1975.27588   20.21601
  1980.0    0.0002524   1982.47742   22.34371
  1987.0    0.0002515   1989.67908   24.82187
  1995.0    0.0002506   1996.88074   27.73088
  2003.0    0.0002496   2004.08252   31.17514
  2013.0    0.0002485   2011.28406   35.29285
  2022.0    0.0002475   2018.48584   40.27265
  2030.0    0.0002466   2025.68762   46.38700
  2043.0    0.0002454   2032.23523   54.06892
  2059.0    0.0002442   2035.57324   64.10209
  2078.0    0.0002429   2038.91138   78.04350
  2107.0    0.0002410   2042.24939   99.03526
  2149.0    0.0002384   2045.58752   133.02185
  2208.0    0.0002349   2048.92554   189.91307
  2305.0    0.0002295   2052.26367   283.46039
  2455.0    0.0002217   2055.60181   428.17258
  2672.0    0.0002114   2058.93994   632.41980
  2954.0    0.0001994   2062.27808   888.59241
  3259.0    0.0001878   2065.61621   1161.01978
  3500.0    0.0001796   2068.95410   1374.04272
  3578.0    0.0001770   2072.29224   1430.53589
  3458.0    0.0001807   2075.63037   1298.51526
  3192.0    0.0001897   2078.96851   1051.44116
  2891.0    0.0002011   2082.30640   784.55914
  2636.0    0.0002118   2085.64453   555.60529
  2454.0    0.0002201   2088.98291   386.16531
  2337.0    0.0002258   2092.32080   274.46106
  2266.0    0.0002293   2095.65894   206.02905
  2223.0    0.0002314   2098.99707   162.99646
  2195.0    0.0002327   2102.33521   131.86205
  2177.0    0.0002335   2105.67310   106.61179
  2165.0    0.0002340   2109.01123   85.73484
  2156.0    0.0002343   2112.34937   68.90474
  2149.0    0.0002345   2115.68750   55.82329
  2145.0    0.0002345   2119.02563   45.97802
  2145.0    0.0002343   2122.36377   38.68428
  2144.0    0.0002342   2125.70190   33.24276
  2143.0    0.0002341   2129.03979   29.07305
  2143.0    0.0002339   2132.37793   25.76284
  2141.0    0.0002338   2135.71606   23.04818
  2142.0    0.0002336   2139.05420   20.76750
  2146.0    0.0002332   2142.52612   18.82000
  2149.0    0.0002328   2146.04541   17.13843
  2150.0    0.0002326   2149.56494   15.67447
  2155.0    0.0002321   2153.08447   14.39152
  2159.0    0.0002317   2156.60400   13.26056
  2161.0    0.0002314   2160.12354   12.25832
  2163.0    0.0002311   2163.64307   11.36590
  2167.0    0.0002307   2167.16235   10.56776
  2169.0    0.0002304   2170.68188    9.85102
  2171.0    0.0002301   2174.20142    9.22008
  2172.0    0.0002299   2177.72095    8.63608
  2174.0    0.0002296   2181.24048    8.10613
  2177.0    0.0002293   2184.75977    7.62375
  2180.0    0.0002289   2188.27930    7.18341
  2185.0    0.0002285   2191.79883    6.78038
  2188.0    0.0002281   2195.31836    6.41056
  2192.0    0.0002277   2198.83765    6.07039
  2195.0    0.0002274   2202.35718    5.75682
  2198.0    0.0002271   2205.87671    5.46715
  2201.0    0.0002267   2209.39624    5.19902
  2206.0    0.0002263   2212.91577    4.95035
  2208.0    0.0002260   2216.43506    4.71932
  2212.0    0.0002256   2219.95459    4.50433
  2216.0    0.0002252   2223.47412    4.30393
  2218.0    0.0002250   2226.99365    4.11684
  2221.0    0.0002246   2230.55591    3.94194
  2225.0    0.0002242   2234.14941    3.77821
  2231.0    0.0002238   2237.74316    3.62473
  2234.0    0.0002234   2241.33691    3.48068
  2234.0    0.0002233   2244.93042    3.34535
  2237.0    0.0002229   2248.52393    3.21804
  2242.0    0.0002225   2252.11768    3.09818
  2246.0    0.0002221   2255.71143    2.98522
  2251.0    0.0002217   2259.30469    7.96281
  2255.0    0.0002214   2262.89844    8.01994
  2258.0    0.0002210   2266.49219    8.09008
  2261.0    0.0002207   2270.08569    8.17333
  2264.0    0.0002204   2273.67920    8.26989
  2267.0    0.0002201   2277.27295    8.38000
  2273.0    0.0002196   2280.86670    8.50400
  2280.0    0.0002191   2284.46021    8.64229
  2284.0    0.0002187   2288.05371    8.79537
  2288.0    0.0002184   2291.64746    8.96380
  2293.0    0.0002180   2295.24097    9.14826
  2297.0    0.0002176   2298.83472    9.34950
  2301.0    0.0002173   2302.42822    7.74663
  2304.0    0.0002169   2306.02197    8.03784
  2309.0    0.0002165   2309.61548    8.34646
  2314.0    0.0002161   2313.20898    8.67388
  2316.0    0.0002159   2316.80273    9.02164
  2318.0    0.0002156   2320.39624    9.39142
  2321.0    0.0002153   2323.98999    9.78510
  2327.0    0.0002149   2327.58350   10.20480
  2333.0    0.0002144   2331.17725   10.59044
  2337.0    0.0002141   2334.77075   11.07127
  2341.0    0.0002137   2338.36426   11.58594
  2345.0    0.0002134   2341.95801   12.13776
  2349.0    0.0002130   2345.55176   12.93834
  2354.0    0.0002126   2349.14526   13.58270
  2360.0    0.0002122   2352.73901   14.27757
  2365.0    0.0002118   2356.33252   15.02882
  2370.0    0.0002114   2359.92627   15.84363
  2371.0    0.0002112   2363.51978   16.73132
  2376.0    0.0002108   2367.11328   17.70477
  2383.0    0.0002104   2370.70703   18.78266
  2391.0    0.0002099   2374.30054   19.99283
  2400.0    0.0002093   2377.89404   21.37580
  2405.0    0.0002089   2381.48779   22.98699
  2409.0    0.0002086   2385.08154   24.89426
  2415.0    0.0002079   2394.47314   27.16910
  2424.0    0.0002067   2413.91235   29.86903
  2435.0    0.0002054   2433.35156   33.01437
  2448.0    0.0002041   2452.79053   36.56437
  2461.0    0.0002027   2472.22974   40.65622
  2476.0    0.0002017   2480.93799   44.55816
  2490.0    0.0002009   2487.86255   48.23882
  2502.0    0.0002001   2494.78735   51.50191
  2513.0    0.0001994   2501.71191   54.43578
  2522.0    0.0001988   2508.63696   59.45735
  2530.0    0.0001982   2515.56152   62.93650
  2537.0    0.0001977   2522.48608   67.24546
  2545.0    0.0001971   2529.41089   72.69843
  2559.0    0.0001963   2536.33569   79.59682
  2582.0    0.0001952   2543.26025   88.31382
  2612.0    0.0001938   2550.18506   99.44628
  2652.0    0.0001920   2557.10962   114.08210
  2703.0    0.0001899   2564.03467   134.24376
  2767.0    0.0001874   2570.95923   163.55298
  2853.0    0.0001842   2577.88403   208.07556
  2965.0    0.0001802   2584.80884   277.10657
  3111.0    0.0001754   2591.73364   383.41818
  3298.0    0.0001696   2598.65796   542.23492
  3532.0    0.0001630   2605.58276   768.41626
  3822.0    0.0001555   2612.50781   1071.58850
  4167.0    0.0001474   2619.43237   1449.95569
  4549.0    0.0001394   2626.35693   1884.44775
  4942.0    0.0001320   2633.28198   2333.33740
  5285.0    0.0001262   2640.20654   2728.80347
  5522.0    0.0001224   2647.13135   2983.26367
  5599.0    0.0001212   2654.05566   3021.34644
  5489.0    0.0001227   2660.98071   2830.98022
  5212.0    0.0001269   2667.90552   2471.18530
  4837.0    0.0001332   2674.83008   2031.46741
  4425.0    0.0001407   2681.75464   1587.40356
  4033.0    0.0001488   2688.67969   1188.82861
  3697.0    0.0001565   2695.60425   861.65234
  3429.0    0.0001631   2702.52881   612.45770
  3229.0    0.0001684   2709.45410   434.58554
  3082.0    0.0001725   2716.37842   314.31842
  2977.0    0.0001755   2723.30322   236.14784
  2903.0    0.0001775   2730.22778   186.42523
  2850.0    0.0001790   2737.15259   154.85530
  2816.0    0.0001799   2744.07739   134.63219
  2794.0    0.0001804   2751.00195   121.76111
  2782.0    0.0001805   2757.92651   115.60759
  2780.0    0.0001804   2764.85181   112.56512
  2784.0    0.0001800   2771.77612   113.76148
  2792.0    0.0001795   2778.70068   119.11623
  2806.0    0.0001790   2781.37183   128.35629
  2824.0    0.0001783   2783.75464   140.74159
  2849.0    0.0001775   2786.13770   154.87633
  2874.0    0.0001766   2788.52051   168.57452
  2896.0    0.0001758   2790.90332   178.94322
  2910.0    0.0001753   2793.28638   183.07683
  2914.0    0.0001751   2795.66919   179.57326
  2912.0    0.0001751   2798.05225   169.58160
  2905.0    0.0001753   2800.43506   156.05862
  2900.0    0.0001754   2802.81787   142.26492
  2903.0    0.0001752   2805.20068   130.98079
  2915.0    0.0001748   2807.58374   124.45264
  2936.0    0.0001740   2809.96655   124.58260
  2964.0    0.0001731   2812.34961   133.17633
  3005.0    0.0001718   2814.73242   152.20332
  3059.0    0.0001702   2817.11548   184.00558
  3125.0    0.0001682   2819.49829   231.32043
  3203.0    0.0001660   2821.88110   297.00504
  3295.0    0.0001634   2824.26416   383.35410
  3401.0    0.0001606   2826.64722   490.93909
  3521.0    0.0001575   2829.03003   617.47748
  3650.0    0.0001543   2831.41284   757.45068
  3777.0    0.0001513   2833.79590   902.26868
  3892.0    0.0001486   2836.17871   1039.53125
  3984.0    0.0001466   2838.56152   1151.55627
  4036.0    0.0001454   2840.94458   1216.16858
  4039.0    0.0001453   2843.32739   1214.61829
  3982.0    0.0001465   2845.71045   1143.48730
  3877.0    0.0001487   2848.09326   1018.11700
  3741.0    0.0001517   2850.47632   863.16565
  3600.0    0.0001550   2852.85913   701.80048
  3461.0    0.0001583   2855.24194   551.02032
  3340.0    0.0001614   2857.62476   421.21881
  3243.0    0.0001639   2860.00781   317.12216
  3169.0    0.0001658   2862.39063   239.07404
  3115.0    0.0001672   2864.77368   184.51674
  3079.0    0.0001682   2867.15674   149.62532
  3055.0    0.0001688   2869.53955   130.59059
  3041.0    0.0001691   2871.92236   124.40627
  3039.0    0.0001691   2874.30518   129.15215
  3046.0    0.0001689   2876.68823   143.80162
  3064.0    0.0001683   2879.07129   167.73381
  3091.0    0.0001675   2881.45386   200.13550
  3127.0    0.0001664   2883.83691   239.43222
  3172.0    0.0001651   2886.21997   282.83792
  3219.0    0.0001637   2888.60278   326.06973
  3261.0    0.0001626   2890.98560   363.38358
  3289.0    0.0001618   2893.36865   383.35464
  3298.0    0.0001615   2895.75146   391.23053
  3286.0    0.0001617   2898.13452   381.59778
  3261.0    0.0001623   2900.51709   359.57468
  3236.0    0.0001629   2902.90015   333.41269
  3220.0    0.0001633   2905.28320   311.71005
  3218.0    0.0001633   2907.66602   301.87158
  3236.0    0.0001627   2910.04907   309.44467
  3272.0    0.0001617   2912.43188   337.63815
  3325.0    0.0001603   2914.81470   386.83865
  3393.0    0.0001585   2917.19775   454.29520
  3470.0    0.0001565   2919.58081   533.81854
  3545.0    0.0001546   2921.96338   615.92395
  3607.0    0.0001531   2924.34644   688.07935
  3646.0    0.0001522   2926.72925   736.09674
  3655.0    0.0001519   2929.11230   748.08429
  3628.0    0.0001525   2931.49536   719.89178
  3573.0    0.0001537   2933.87793   657.32855
  3498.0    0.0001554   2936.26099   572.44806
  3412.0    0.0001575   2938.64404   478.11621
  3326.0    0.0001596   2941.02686   384.86447
  3248.0    0.0001615   2943.40967   300.02173
  3182.0    0.0001632   2945.79272   227.84177
  3128.0    0.0001646   2948.17554   169.92159
  3090.0    0.0001656   2950.55835   125.56212
  3064.0    0.0001662   2952.94165   93.38419
  3044.0    0.0001667   2955.32422   70.76671
  3028.0    0.0001671   2957.70728   55.43391
  3014.0    0.0001674   2960.09009   44.89790
  3005.0    0.0001676   2962.47290   37.67307
  2999.0    0.0001677   2964.85596   32.57634
  2994.0    0.0001678   2967.23877   28.82243
  2992.0    0.0001677   2969.62158   25.91904
  2989.0    0.0001678   2972.00488   23.57098
  2986.0    0.0001678   2974.38745   21.60518
  2983.0    0.0001678   2976.77051   19.91850
  2983.0    0.0001677   2979.15356   18.44776
  2983.0    0.0001677   2981.53638   17.15182
  2984.0    0.0001676   2983.91919   16.00112
  2985.0    0.0001675   2985.64453   14.97379
  2984.0    0.0001675   2986.39868   14.66315
  2984.0    0.0001675   2987.15283   13.86185
  2984.0    0.0001674   2987.90698   13.14088
  2983.0    0.0001675   2988.66113   12.49028
  2984.0    0.0001674   2989.41528   11.90183
  2986.0    0.0001673   2990.16943    9.34154
  2988.0    0.0001672   2990.92358    8.91680
  2988.0    0.0001672   2991.67798    8.53338
  2988.0    0.0001672   2992.43213    8.18711
  2990.0    0.0001671   2993.18628    7.87422
  2993.0    0.0001670   2993.94043    7.59161
  2995.0    0.0001669   2994.69458    7.33650
  2996.0    0.0001669   2995.44873    7.10656
  2996.0    0.0001669   2996.20288    6.89979
  2994.0    0.0001669   2996.95703    6.71439
  2996.0    0.0001668   2997.71118    6.54890
  3000.0    0.0001667   2998.46533    6.40210
  2999.0    0.0001667   2999.21948    6.27295
  3000.0    0.0001667   2999.97363    6.16069
  3000.0    0.0001666   3000.72778    6.06487
  3000.0    0.0001666   3001.48193    5.98534
  3003.0    0.0001665   3002.23608    5.92240
  3004.0    0.0001665   3002.99023    5.87684
  3006.0    0.0001664   3003.74438    5.85001
  3006.0    0.0001664   3004.49854    5.84389
  3007.0    0.0001663   3005.25269    5.86092
  3009.0    0.0001662   3006.12134    5.90384
  3011.0    0.0001661   3008.71069    5.34023
  3015.0    0.0001659   3011.30054    5.46057
  3017.0    0.0001658   3013.89014    5.61104
  3020.0    0.0001657   3016.47974    6.08686
  3020.0    0.0001656   3019.06934    6.29903
  3020.0    0.0001655   3021.65918    6.53136
  3022.0    0.0001654   3024.24878    6.89937
  3026.0    0.0001652   3026.83838    7.15215
  3029.0    0.0001651   3029.42798    7.40418
  3031.0    0.0001649   3032.01758    7.65766
  3033.0    0.0001648   3034.60742    7.92831
  3038.0    0.0001646   3037.19678    8.24798
  3042.0    0.0001644   3039.78662    8.66264
  3045.0    0.0001643   3042.37622    9.22789
  3051.0    0.0001640   3044.96582    8.61057
  3058.0    0.0001638   3047.76855    9.69857
  3066.0    0.0001635   3051.91138   11.10706
  3072.0    0.0001632   3056.05347   12.86863
  3079.0    0.0001629   3060.19604   14.98704
  3086.0    0.0001626   3064.33813   17.42570
  3096.0    0.0001622   3068.48071   20.10186
  3104.0    0.0001619   3072.62329   22.88189
  3112.0    0.0001616   3076.76563   25.58360
  3118.0    0.0001613   3080.90796   27.98895
  3121.0    0.0001612   3085.05054   29.87776
  3123.0    0.0001610   3089.19263   31.09881
  3124.0    0.0001609   3093.33521   31.65418
  3125.0    0.0001607   3097.47778   31.73746
  3124.0    0.0001606   3101.61987   31.69738
  3122.0    0.0001606   3105.76245   31.96622
  3122.0    0.0001605   3109.90479   33.00425
  3124.0    0.0001603   3114.04712   35.26770
  3126.0    0.0001602   3118.18970   39.48969
  3130.0    0.0001600   3122.33179   45.41780
  3139.0    0.0001596   3126.47437   53.60242
  3149.0    0.0001593   3130.61694   64.13391
  3164.0    0.0001588   3134.75903   76.90427
  3182.0    0.0001582   3138.90137   91.58743
  3202.0    0.0001576   3143.04419   107.63630
  3225.0    0.0001570   3147.18652   124.30756
  3247.0    0.0001563   3151.32886   140.74017
  3269.0    0.0001557   3155.47095   156.08795
  3286.0    0.0001552   3159.61353   169.82333
  3298.0    0.0001548   3163.75610   182.14519
  3308.0    0.0001544   3167.89819   194.28378
  3315.0    0.0001542   3172.04077   208.38199
  3323.0    0.0001539   3176.18335   226.95921
  3337.0    0.0001535   3180.32568   252.28116
  3363.0    0.0001528   3184.46777   285.85541
  3403.0    0.0001517   3188.61060   328.06244
  3459.0    0.0001504   3192.75269   377.89529
  3534.0    0.0001486   3196.89526   433.48117
  3625.0    0.0001465   3201.03784   489.54947
  3722.0    0.0001444   3205.17993   541.27356
  3815.0    0.0001424   3209.32251   582.28381
  3886.0    0.0001409   3213.46484   606.26398
  3916.0    0.0001402   3217.60718   608.69141
  3901.0    0.0001404   3221.74976   588.49750
  3846.0    0.0001414   3225.89185   548.46051
  3764.0    0.0001430   3230.03442   493.94247
  3669.0    0.0001449   3234.17700   431.10153
  3573.0    0.0001468   3238.31909   365.63467
  3489.0    0.0001486   3242.46143   302.52026
  3422.0    0.0001500   3246.60425   244.39650
  3368.0    0.0001511   3250.74658   193.76988
  3331.0    0.0001518   3254.88892   151.62744
  3305.0    0.0001523   3259.03101   118.04368
  3288.0    0.0001526   3263.17358   92.41185
  3277.0    0.0001528   3267.31616   73.75081
  3271.0    0.0001528   3271.45850   60.95314
  3271.0    0.0001528   3275.47583   52.98820
  3275.0    0.0001526   3279.29077   49.04130
  3282.0    0.0001523   3283.10547   48.57064
  3292.0    0.0001520   3286.92017   51.30996
  3304.0    0.0001516   3290.73535   57.22356
  3319.0    0.0001512   3294.54980   66.42258
  3338.0    0.0001507   3298.36450   79.06768
  3359.0    0.0001501   3302.17944   95.24728
  3385.0    0.0001495   3305.99414   114.87353
  3415.0    0.0001487   3309.80908   137.56871
  3445.0    0.0001480   3313.62378   162.59087
  3476.0    0.0001472   3317.43848   188.78658
  3508.0    0.0001464   3321.25342   214.56339
  3536.0    0.0001458   3325.06812   237.95030
  3557.0    0.0001452   3328.88281   256.79190
  3572.0    0.0001448   3332.69800   269.11703
  3579.0    0.0001446   3336.51245   273.61703
  3577.0    0.0001446   3340.32715   269.95767
  3566.0    0.0001447   3344.14233   258.72507
  3552.0    0.0001449   3347.95679   243.39954
  3534.0    0.0001452   3351.77173   221.24380
  3512.0    0.0001456   3355.58643   196.45848
  3491.0    0.0001460   3359.40112   170.59003
  3469.0    0.0001464   3363.21606   145.40172
  3447.0    0.0001468   3367.03076   122.13976
  3429.0    0.0001471   3370.84546   101.64190
  3417.0    0.0001472   3374.66064   84.38143
  3408.0    0.0001474   3378.47510   70.54072
  3402.0    0.0001474   3382.28979   60.08968
  3399.0    0.0001474   3386.10498   52.88591
  3401.0    0.0001473   3389.91943   48.75382
  3404.0    0.0001471   3393.73438   47.54235
  3410.0    0.0001469   3397.54907   49.16434
  3418.0    0.0001466   3401.12720   53.60094
  3427.0    0.0001464   3404.69263   60.87800
  3440.0    0.0001460   3408.25806   71.03689
  3453.0    0.0001457   3411.82349   83.99572
  3472.0    0.0001452   3415.38916   99.56403
  3492.0    0.0001447   3418.95459   117.41260
  3516.0    0.0001441   3422.52002   136.88313
  3538.0    0.0001436   3426.08569   157.07204
  3558.0    0.0001431   3429.65137   176.80023
  3577.0    0.0001427   3433.21680   194.66881
  3595.0    0.0001422   3436.78198   209.15688
  3607.0    0.0001419   3440.34790   218.90344
  3614.0    0.0001417   3443.91333   222.94624
  3614.0    0.0001416   3447.47852   221.26524
  3612.0    0.0001416   3451.04443   214.77884
  3611.0    0.0001416   3454.60986   205.16409
  3609.0    0.0001415   3458.17529   194.48312
  3608.0    0.0001415   3461.74048   186.20197
  3610.0    0.0001414   3465.30664   179.60974
  3621.0    0.0001411   3468.87183   177.69580
  3639.0    0.0001407   3472.43726   181.73326
  3662.0    0.0001401   3476.00269   192.50902
  3693.0    0.0001395   3479.56836   210.07204
  3733.0    0.0001386   3483.13379   234.41048
  3779.0    0.0001377   3486.69946   264.34573
  3832.0    0.0001366   3490.26489   298.30820
  3887.0    0.0001355   3493.83057   334.19604
  3941.0    0.0001345   3497.39600   369.47760
  3992.0    0.0001335   3500.96143   401.36432
  4027.0    0.0001328   3504.52710   427.10742
  4045.0    0.0001324   3508.09253   444.50909
  4048.0    0.0001323   3511.65796   452.53574
  4038.0    0.0001324   3515.22363   451.64279
  4018.0    0.0001327   3518.78906   443.58322
  3986.0    0.0001332   3522.35474   430.77591
  3952.0    0.0001338   3525.91992   414.75760
  3924.0    0.0001342   3529.48560   399.22971
  3906.0    0.0001345   3533.05127   384.52609
  3893.0    0.0001347   3536.61646   371.09595
  3882.0    0.0001348   3540.18188   358.63504
  3876.0    0.0001348   3543.74780   346.23843
  3873.0    0.0001348   3547.31299   332.70364
  3860.0    0.0001350   3550.87842   316.95419
  3839.0    0.0001353   3554.44434   298.45490
  3818.0    0.0001356   3558.00952   277.39459
  3792.0    0.0001360   3561.57520   254.55643
  3762.0    0.0001365   3565.14063   231.07327
  3739.0    0.0001369   3568.70605   208.18637
  3722.0    0.0001372   3572.27173   187.13994
  3706.0    0.0001374   3575.83716   169.13623
  3694.0    0.0001376   3579.40259   155.33778
  3693.0    0.0001375   3582.96826   146.90337
  3704.0    0.0001372   3586.53369   145.02901
  3718.0    0.0001369   3590.09912   150.99046
  3739.0    0.0001364   3593.66479   166.18172
  3769.0    0.0001358   3597.23022   192.10216
  3812.0    0.0001350   3600.79590   230.31100
  3868.0    0.0001339   3604.36108   282.27332
  3940.0    0.0001325   3607.92700   349.18158
  4029.0    0.0001309   3611.49243   431.65973
  4136.0    0.0001291   3615.05762   529.47437
  4259.0    0.0001270   3618.62329   641.28107
  4404.0    0.0001246   3622.18896   764.34021
  4572.0    0.0001220   3625.75415   894.39478
  4749.0    0.0001194   3629.31958   1025.88818
  4923.0    0.0001169   3632.88550   1150.85181
  5082.0    0.0001147   3636.45093   1261.65808
  5210.0    0.0001130   3640.01636   1349.07336
  5278.0    0.0001121   3643.58179   1404.69165
  5286.0    0.0001120   3647.14746   1422.84631
  5234.0    0.0001126   3650.71289   1401.41919
  5126.0    0.0001139   3654.27832   1342.97351
  4970.0    0.0001160   3657.84399   1253.80444
  4794.0    0.0001183   3661.40942   1142.33313
  4622.0    0.0001207   3664.97510   1017.48889
  4462.0    0.0001230   3668.54028   887.57574
  4313.0    0.0001253   3672.10620   760.22876
  4190.0    0.0001272   3675.67163   640.13098
  4096.0    0.0001287   3679.23706   531.88959
  4021.0    0.0001299   3682.80273   438.14514
  3963.0    0.0001308   3686.36792   360.24026
  3928.0    0.0001313   3689.93359   298.41354
  3904.0    0.0001317   3693.49902   252.17520
  3887.0    0.0001319   3697.06445   220.57550
  3877.0    0.0001320   3700.63037   202.66850
  3877.0    0.0001320   3704.19556   197.12094
  3888.0    0.0001317   3707.76099   203.48106
  3905.0    0.0001314   3711.32690   220.83934
  3925.0    0.0001309   3714.89209   248.34337
  3957.0    0.0001303   3718.45752   285.70987
  3998.0    0.0001296   3722.02344   332.18613
  4043.0    0.0001288   3725.58862   386.64279
  4101.0    0.0001278   3729.15430   447.46780
  4177.0    0.0001265   3732.71973   512.42999
  4266.0    0.0001250   3736.28516   578.73663
  4362.0    0.0001235   3739.85083   642.84619
  4466.0    0.0001219   3743.41626   700.81506
  4577.0    0.0001202   3746.98169   748.37897
  4665.0    0.0001189   3750.54736   781.36932
  4720.0    0.0001180   3754.11279   796.40424
  4747.0    0.0001176   3757.67822   791.66473
  4738.0    0.0001177   3761.24390   767.40179
  4696.0    0.0001182   3764.80908   725.89111
  4627.0    0.0001191   3768.37500   670.79865
  4547.0    0.0001202   3771.94019   606.42017
  4455.0    0.0001215   3775.50562   536.99786
  4354.0    0.0001230   3779.07153   466.36578
  4252.0    0.0001245   3782.63672   397.77588
  4163.0    0.0001258   3786.20239   333.60043
  4083.0    0.0001270   3789.76807   276.03769
  4017.0    0.0001281   3793.33325   225.54124
  3966.0    0.0001288   3796.89868   182.39914
  3927.0    0.0001294   3800.46460   146.70084
  3897.0    0.0001299   3804.02979   117.29272
  3872.0    0.0001302   3807.59546   94.62867
  3857.0    0.0001304   3811.16089   77.16018
  3848.0    0.0001305   3814.72656   63.94751
  3841.0    0.0001306   3818.29199   54.28014
  3837.0    0.0001306   3821.85742   47.05592
  3837.0    0.0001305   3825.42310   41.79262
  3838.0    0.0001304   3828.98853   37.97907
  3837.0    0.0001304   3832.55396   35.22676
  3839.0    0.0001303   3836.11377   33.25378
  3842.0    0.0001302   3839.58643   31.86767
  3843.0    0.0001301   3843.05859   30.57272
  3847.0    0.0001300   3846.53052   30.06483
  3853.0    0.0001298   3850.00293   29.94267
  3859.0    0.0001297   3853.47534   30.22747
  3863.0    0.0001296   3856.94727   30.97298
  3869.0    0.0001294   3860.41943   32.26097
  3877.0    0.0001292   3863.89209   34.19633
  3885.0    0.0001290   3867.36401   36.90146
  3892.0    0.0001288   3870.83643   40.50982
  3901.0    0.0001286   3874.30835   45.15444
  3910.0    0.0001284   3877.78076   50.95882
  3920.0    0.0001282   3881.25317   58.02118
  3931.0    0.0001280   3884.72534   66.46281
  3944.0    0.0001277   3888.19727   76.17810
  3961.0    0.0001274   3891.66992   87.18491
  3976.0    0.0001271   3895.14185   99.37994
  3991.0    0.0001268   3898.61426   112.60626
  4008.0    0.0001264   3902.08667   126.65443
  4026.0    0.0001261   3905.55859   141.27309
  4043.0    0.0001258   3909.03101   156.19357
  4060.0    0.0001255   3912.50293   171.15187
  4078.0    0.0001251   3915.97534   185.95111
  4096.0    0.0001248   3919.44775   200.51932
  4115.0    0.0001244   3922.91992   215.02493
  4138.0    0.0001240   3926.39209   229.66583
  4161.0    0.0001236   3929.86450   244.93800
  4186.0    0.0001232   3933.33643   261.30844
  4214.0    0.0001227   3936.80884   276.90741
  4247.0    0.0001222   3940.28101   296.54224
  4282.0    0.0001216   3943.75366   317.74844
  4316.0    0.0001211   3947.22559   340.59229
  4349.0    0.0001205   3950.69751   364.53073
  4383.0    0.0001200   3954.17017   388.76489
  4416.0    0.0001195   3957.64233   412.26443
  4449.0    0.0001189   3961.11450   434.27515
  4480.0    0.0001185   3964.58667   454.06189
  4508.0    0.0001180   3968.05908   471.16272
  4530.0    0.0001177   3971.53101   485.37766
  4547.0    0.0001174   3975.00342   496.66330
  4565.0    0.0001171   3978.47559   504.95883
  4580.0    0.0001168   3981.94824   510.06024
  4585.0    0.0001167   3985.42017   511.57059
  4585.0    0.0001167   3988.89209   508.94360
  4582.0    0.0001167   3992.36475   501.58713
  4568.0    0.0001168   3995.83691   489.15347
  4548.0    0.0001170   3999.30933   471.49893
  4522.0    0.0001173   4002.78125   449.06030
  4493.0    0.0001177   4006.25366   422.74026
  4460.0    0.0001181   4009.72583   393.86020
  4425.0    0.0001185   4013.19800   363.98709
  4395.0    0.0001189   4016.67017   334.79016
  4368.0    0.0001193   4020.14282   307.90344
  4347.0    0.0001195   4023.61475   284.81500
  4333.0    0.0001197   4027.08667   266.92410
  4329.0    0.0001197   4030.55933   255.31981
  4331.0    0.0001196   4034.03149   250.86394
  4342.0    0.0001194   4037.50391   254.12701
  4364.0    0.0001190   4040.97583   265.31735
  4395.0    0.0001185   4044.44824   282.96838
  4427.0    0.0001180   4047.92041   309.28705
  4467.0    0.0001174   4051.39258   342.00012
  4517.0    0.0001167   4054.86499   379.82117
  4571.0    0.0001159   4058.33740   421.09927
  4624.0    0.0001152   4061.80933   463.84912
  4683.0    0.0001143   4065.28149   505.82593
  4739.0    0.0001136   4068.75391   544.62244
  4788.0    0.0001129   4072.22607   577.81897
  4828.0    0.0001123   4075.69849   603.20251
  4856.0    0.0001119   4079.17041   618.98853
  4870.0    0.0001117   4082.64307   624.01721
  4862.0    0.0001118   4086.11499   617.86426
  4835.0    0.0001121   4089.58716   600.87744
  4791.0    0.0001126   4093.05957   574.12909
  4731.0    0.0001133   4096.53174   539.29016
  4664.0    0.0001141   4100.00391   498.43988
  4594.0    0.0001150   4103.47656   453.82977
  4525.0    0.0001159   4106.94824   407.67584
  4457.0    0.0001167   4110.42090   361.98154
  4399.0    0.0001175   4113.89307   318.48404
  4352.0    0.0001181   4117.36523   278.56107
  4310.0    0.0001186   4120.83740   243.20860
  4277.0    0.0001191   4124.30957   213.06705
  4253.0    0.0001193   4127.78174   188.41734
  4237.0    0.0001195   4131.25439   169.23523
  4227.0    0.0001196   4134.72656   155.24553
  4222.0    0.0001196   4138.19873   145.89871
  4221.0    0.0001196   4141.67090   140.53674
  4226.0    0.0001195   4145.14307   138.37297
  4232.0    0.0001193   4148.61523   138.55371
  4239.0    0.0001192   4152.08789   140.20238
  4246.0    0.0001190   4155.55957   142.45845
  4250.0    0.0001189   4159.03223   144.52147
  4251.0    0.0001189   4162.50391   145.70126
  4253.0    0.0001188   4165.97656   145.57547
  4251.0    0.0001188   4169.44873   143.64539
  4246.0    0.0001188   4172.92139   139.94571
  4241.0    0.0001188   4176.39307   134.65796
  4234.0    0.0001189   4179.86572   128.05432
  4228.0    0.0001189   4183.33740   120.57329
  4219.0    0.0001190   4186.81006   112.65913
  4213.0    0.0001190   4190.28223   104.74383
  4210.0    0.0001190   4193.75439   97.21445
  4208.0    0.0001190   4197.22656   90.39181
  4209.0    0.0001189   4200.69873   84.52313
  4211.0    0.0001188   4204.17139   79.55206
  4215.0    0.0001187   4207.24072   76.00744
  4218.0    0.0001187   4208.27441   73.67199
  4222.0    0.0001186   4209.30811   72.47769
  4231.0    0.0001185   4210.34180   72.33841
  4240.0    0.0001183   4211.37500   73.10083
  4247.0    0.0001182   4212.40869   74.60878
  4256.0    0.0001181   4213.44238   76.71452
  4267.0    0.0001179   4214.47607   79.35857
  4276.0    0.0001178   4215.50977   82.37670
  4284.0    0.0001176   4216.54346   85.81286
  4296.0    0.0001175   4217.57715   89.73883
  4309.0    0.0001173   4218.61084   94.26004
  4321.0    0.0001171   4219.64453   98.98191
  4333.0    0.0001169   4220.67822   105.04878
  4351.0    0.0001167   4221.71191   111.99965
  4366.0    0.0001164   4222.74561   119.83868
  4382.0    0.0001162   4223.77930   128.50127
  4404.0    0.0001159   4224.81299   137.84503
  4427.0    0.0001156   4225.84668   147.65689
  4443.0    0.0001153   4226.87988   157.66261
  4458.0    0.0001151   4227.91357   167.39151
  4473.0    0.0001149   4228.94727   176.78876
  4485.0    0.0001147   4229.98096   185.04294
  4496.0    0.0001146   4231.01465   191.98203
  4506.0    0.0001144   4232.04834   197.48642
  4513.0    0.0001143   4233.08203   200.88055
  4513.0    0.0001143   4234.11572   201.80124
  4509.0    0.0001144   4235.14941   200.07875
  4500.0    0.0001145   4236.18311   195.70602
  4488.0    0.0001146   4237.21680   188.86342
  4470.0    0.0001148   4238.25049   179.90057
  4449.0    0.0001151   4239.28418   169.27173
  4430.0    0.0001153   4240.31787   157.47607
  4411.0    0.0001156   4241.35156   145.00793
  4392.0    0.0001158   4242.38525   132.31711
  4376.0    0.0001160   4243.41846   119.78936
  4364.0    0.0001162   4244.45264   107.73048
  4351.0    0.0001163   4245.48584   96.37090
  4340.0    0.0001165   4246.51953   85.86041
  4331.0    0.0001166   4247.55322   76.28467
  4321.0    0.0001167   4248.58691   67.67385
  4312.0    0.0001168   4249.62061   60.01878
  4306.0    0.0001169   4250.65430   53.28074
  4302.0    0.0001169   4251.68799   47.40208
  4297.0    0.0001170   4252.72168   42.32298
  4291.0    0.0001170   4253.75537   37.94431
  4288.0    0.0001171   4254.78906   34.19306
  4285.0    0.0001171   4255.82275   30.99807
  4281.0    0.0001171   4256.85645   28.30682
  4278.0    0.0001171   4257.89014   25.95704
  4277.0    0.0001171   4258.92383   23.93559
  4274.0    0.0001172   4259.95752   22.18967
  4271.0    0.0001172   4260.99121   20.67877
  4268.0    0.0001172   4262.02441   19.37477
  4267.0    0.0001172   4263.05811   18.26146
  4265.0    0.0001172   4264.09180   17.33264
  4263.0    0.0001173   4265.12549   16.58906
  4263.0    0.0001172   4266.15918   16.03595
  4264.0    0.0001172   4267.19287   15.68064
  4264.0    0.0001172   4268.22656   15.53136
  4265.0    0.0001172   4269.50732   15.59594
  4269.0    0.0001171   4271.31494   15.88125
  4273.0    0.0001170   4273.12256   16.39277
  4275.0    0.0001170   4274.93018   17.20674
  4280.0    0.0001169   4276.73779   18.18221
  4286.0    0.0001168   4278.54541   19.39112
  4291.0    0.0001167   4280.35303   20.83383
  4297.0    0.0001166   4282.16064   21.71178
  4307.0    0.0001164   4283.96826   23.63709
  4315.0    0.0001163   4285.77539   25.79838
  4322.0    0.0001161   4287.58301   28.20069
  4330.0    0.0001160   4289.39063   30.85445
  4342.0    0.0001158   4291.19824   33.77422
  4351.0    0.0001157   4293.00586   36.97793
  4361.0    0.0001155   4294.81348   40.54508
  4371.0    0.0001154   4296.62109   44.36215
  4379.0    0.0001152   4298.42871   48.48701
  4387.0    0.0001151   4300.23633   52.89856
  4398.0    0.0001149   4302.04395   57.55227
  4410.0    0.0001148   4303.85156   62.38037
  4419.0    0.0001146   4305.65918   67.29457
  4424.0    0.0001145   4307.46680   72.18564
  4429.0    0.0001144   4309.27393   76.93767
  4437.0    0.0001143   4311.08203   81.39501
  4441.0    0.0001142   4312.88965   85.41525
  4444.0    0.0001142   4314.69678   88.84226
  4451.0    0.0001141   4316.50439   91.52534
  4455.0    0.0001140   4318.31201   93.33311
  4451.0    0.0001140   4320.11963   94.17384
  4447.0    0.0001140   4321.92725   93.84682
  4444.0    0.0001141   4323.73486   92.71472
  4442.0    0.0001141   4325.54248   90.70380
  4435.0    0.0001141   4327.35010   87.96216
  4431.0    0.0001142   4329.15771   84.67260
  4428.0    0.0001142   4330.96533   81.03615
  4422.0    0.0001142   4332.77295   77.25294
  4417.0    0.0001143   4334.58057   73.50795
  4414.0    0.0001143   4336.38770   69.95801
  4410.0    0.0001143   4338.19531   66.74628
  4408.0    0.0001143   4340.00293   63.91428
  4410.0    0.0001143   4341.81055   61.52205
  4413.0    0.0001142   4343.61816   59.56790
  4414.0    0.0001142   4345.42578   58.05079
  4416.0    0.0001141   4347.23340   56.81899
  4421.0    0.0001140   4349.04102   55.81124
  4423.0    0.0001140   4350.84863   54.91225
  4420.0    0.0001140   4352.65625   54.00345
  4418.0    0.0001140   4354.46387   52.97758
  4419.0    0.0001140   4356.27148   51.69219
  4417.0    0.0001140   4358.07861   50.21962
  4412.0    0.0001140   4359.88623   48.48833
  4410.0    0.0001140   4361.69385   46.52215
  4409.0    0.0001140   4363.50195   44.37044
  4405.0    0.0001140   4365.30908   42.09840
  4400.0    0.0001141   4367.11670   39.77703
  4399.0    0.0001140   4368.92432   37.47623
  4397.0    0.0001141   4370.73193   35.25969
  4393.0    0.0001141   4372.53955   33.18068
  4389.0    0.0001141   4374.34717   31.30181
  4389.0    0.0001141   4376.15479   29.66168
  4387.0    0.0001141   4377.96240   28.18628
  4386.0    0.0001141   4379.77002   26.92709
  4389.0    0.0001140   4381.57764   25.87252
  4389.0    0.0001140   4383.38525   25.00314
  4389.0    0.0001140   4385.19238   24.29628
  4393.0    0.0001139   4387.00000   23.73086
  4397.0    0.0001138   4388.26074   23.29231
  4400.0    0.0001138   4389.31787   22.87087
  4402.0    0.0001137   4390.37500   22.55481
  4403.0    0.0001137   4391.43213   22.51973
  4405.0    0.0001137   4392.48926   22.65775
  4406.0    0.0001136   4393.54639   22.99978
  4408.0    0.0001136   4394.60303   23.57797
  4413.0    0.0001135   4395.66064   24.42193
  4418.0    0.0001134   4396.71729   25.55637
  4421.0    0.0001134   4397.77441   27.01758
  4427.0    0.0001133   4398.83154   28.80967
  4435.0    0.0001132   4399.88867   30.85710
  4442.0    0.0001131   4400.94580   33.18094
  4447.0    0.0001130   4402.00293   35.74395
  4458.0    0.0001129   4403.06006   38.46713
  4467.0    0.0001127   4404.11719   41.34475
  4473.0    0.0001126   4405.17432   44.27598
  4481.0    0.0001125   4406.23145   47.22160
  4489.0    0.0001124   4407.28857   50.02782
  4494.0    0.0001123   4408.34570   52.65721
  4499.0    0.0001123   4409.40283   55.04536
  4507.0    0.0001121   4410.45996   57.15218
  4511.0    0.0001121   4411.51660   58.93919
  4511.0    0.0001121   4412.57373   60.41597
  4513.0    0.0001120   4413.63086   61.61773
  4514.0    0.0001120   4414.68799   62.58776
  4513.0    0.0001120   4415.74512   63.39168
  4514.0    0.0001120   4416.80225   64.12386
  4515.0    0.0001119   4417.85938   64.84713
  4518.0    0.0001119   4418.91650   65.62230
  4518.0    0.0001119   4419.97363   66.49336
  4517.0    0.0001119   4421.03076   67.48355
  4521.0    0.0001118   4422.08789   68.59401
  4524.0    0.0001118   4423.14453   69.80295
  4525.0    0.0001117   4424.20215   71.06820
  4532.0    0.0001116   4425.25879   72.33077
  4539.0    0.0001115   4426.31592   73.52171
  4539.0    0.0001115   4427.37305   74.57096
  4539.0    0.0001115   4428.43018   75.46275
  4545.0    0.0001114   4429.48730   76.05433
  4547.0    0.0001114   4430.54443   76.35913
  4545.0    0.0001114   4431.60156   76.37287
  4547.0    0.0001114   4432.65869   76.07175
  4549.0    0.0001113   4433.71582   75.43885
  4545.0    0.0001114   4434.77295   74.52278
  4545.0    0.0001113   4435.83008   73.23213
  4546.0    0.0001113   4436.88721   71.60952
  4545.0    0.0001113   4437.94434   69.66525
  4540.0    0.0001114   4439.00146   67.40133
  4537.0    0.0001114   4440.05811   64.84424
  4536.0    0.0001114   4441.11523   62.03678
  4531.0    0.0001114   4442.17236   59.03870
  4522.0    0.0001115   4443.22949   55.92160
  4516.0    0.0001116   4444.28662   52.76390
  4511.0    0.0001117   4445.34375   49.64412
  4507.0    0.0001117   4446.40088   46.61949
  4504.0    0.0001117   4447.45801   43.80568
  4502.0    0.0001117   4448.51514   41.23329
  4495.0    0.0001118   4449.57227   38.96416
  4487.0    0.0001119   4450.62939   37.04832
  4485.0    0.0001119   4451.68652   35.51320
  4484.0    0.0001119   4452.74365   34.38723
  4476.0    0.0001120   4453.80078   33.68264
  4469.0    0.0001121   4454.85791   33.30113
  4470.0    0.0001120   4455.91455   33.42621
  4468.0    0.0001120   4456.97168   33.93319
  4463.0    0.0001121   4458.02881   34.76241
  4463.0    0.0001121   4459.08594   35.95941
  4464.0    0.0001121   4460.14307   37.36729
  4464.0    0.0001120   4461.20020   38.97266
  4461.0    0.0001121   4462.25732   40.72132
  4465.0    0.0001120   4463.31445   42.56111
  4469.0    0.0001119   4464.37158   44.44780
  4467.0    0.0001120   4465.34424   46.34628
  4467.0    0.0001119   4466.25439   48.24957
  4468.0    0.0001119   4467.16504   50.11992
  4468.0    0.0001119   4468.07568   51.98037
  4468.0    0.0001119   4468.98584   53.85292
  4471.0    0.0001118   4469.89648   55.77200
  4473.0    0.0001118   4470.80664   57.77893
  4470.0    0.0001118   4471.71729   59.91637
  4472.0    0.0001118   4472.62793   62.22139
  4478.0    0.0001117   4473.53809   64.66410
  4481.0    0.0001117   4474.44873   67.35998
  4482.0    0.0001116   4475.35889   70.25603
  4489.0    0.0001115   4476.26953   73.31358
  4496.0    0.0001114   4477.17969   76.51455
  4497.0    0.0001114   4478.09033   79.71780
  4500.0    0.0001114   4479.00098   82.87138
  4508.0    0.0001113   4479.91113   85.90072
  4511.0    0.0001112   4480.82178   88.72818
  4512.0    0.0001112   4481.73242   91.08293
  4516.0    0.0001111   4482.64258   92.96727
  4520.0    0.0001111   4483.55273   94.30894
  4519.0    0.0001111   4484.46338   95.06919
  4519.0    0.0001111   4485.37402   95.24854
  4522.0    0.0001110   4486.28418   94.88766
  4520.0    0.0001110   4487.19482   94.06077
  4516.0    0.0001111   4488.10547   92.86568
  4517.0    0.0001110   4489.01563   91.43223
  4517.0    0.0001110   4489.92627   89.81091
  4515.0    0.0001110   4490.83643   88.16179
  4517.0    0.0001110   4491.74707   86.55142
  4520.0    0.0001110   4492.65723   85.04500
  4518.0    0.0001110   4493.56787   83.69072
  4517.0    0.0001110   4494.47852   82.50302
  4520.0    0.0001109   4495.38867   81.47924
  4525.0    0.0001108   4496.29932   80.61734
  4525.0    0.0001108   4497.20947   79.82677
  4527.0    0.0001108   4498.12012   79.07624
  4530.0    0.0001108   4499.03027   78.30732
  4529.0    0.0001108   4499.94092   77.46439
  4525.0    0.0001108   4500.85156   76.50124
  4525.0    0.0001108   4501.76172   75.38428
  4528.0    0.0001107   4502.67236   74.09418
  4524.0    0.0001108   4503.58301   72.62499
  4518.0    0.0001108   4504.49316   70.98438
  4519.0    0.0001108   4505.40381   69.19218
  4517.0    0.0001108   4506.31396   67.28107
  4512.0    0.0001109   4507.22461   65.28605
  4513.0    0.0001108   4508.13477   63.28269
  4517.0    0.0001108   4509.04541   61.32525
  4514.0    0.0001108   4509.95605   59.47363
  4511.0    0.0001108   4510.56641   57.77851
  4512.0    0.0001108   4511.08545   56.36977
  4513.0    0.0001108   4511.60400   55.26754
  4513.0    0.0001108   4512.12256   54.51783
  4516.0    0.0001108   4512.64111   54.15305
  4520.0    0.0001107   4513.15967   54.18935
  4523.0    0.0001107   4513.67822   54.62556
  4526.0    0.0001106   4514.19678   55.44238
  4531.0    0.0001105   4514.71533   56.60209
  4538.0    0.0001105   4515.23389   58.04985
  4543.0    0.0001104   4515.75244   59.82797
  4549.0    0.0001103   4516.27100   61.63019
  4558.0    0.0001102   4516.78955   63.47359
  4565.0    0.0001101   4517.30811   65.25946
  4567.0    0.0001101   4517.82715   66.88966
  4575.0    0.0001100   4518.34570   68.19788
  4581.0    0.0001099   4518.86426   69.25170
  4580.0    0.0001099   4519.38281   69.90649
  4581.0    0.0001099   4519.90137   70.11839
  4582.0    0.0001099   4520.41992   69.86329
  4578.0    0.0001099   4520.93848   69.14003
  4576.0    0.0001099   4521.45703   67.96992
  4575.0    0.0001099   4521.97559   66.39921
  4573.0    0.0001099   4522.49414   64.48173
  4569.0    0.0001100   4523.01270   62.29596
  4566.0    0.0001100   4523.53174   59.92614
  4563.0    0.0001100   4524.05029   57.39610
  4557.0    0.0001101   4524.56885   54.94424
  4552.0    0.0001102   4525.08740   52.53461
  4550.0    0.0001102   4525.60596   50.29606
  4548.0    0.0001102   4526.12451   48.22532
  4544.0    0.0001102   4526.64307   46.40068
  4542.0    0.0001103   4527.16162   44.85560
  4542.0    0.0001103   4527.68018   43.61110
  4538.0    0.0001103   4528.19873   42.66771
  4532.0    0.0001104   4528.71729   42.04009
  4536.0    0.0001103   4529.23584   41.70880
  4537.0    0.0001103   4529.75439   41.65573
  4534.0    0.0001103   4530.27344   41.85749
  4533.0    0.0001103   4530.79199   42.28736
  4535.0    0.0001103   4531.31055   42.93145
  4533.0    0.0001103   4531.82910   43.73503
  4530.0    0.0001103   4532.34766   44.69608
  4533.0    0.0001103   4532.86621   45.80223
  4535.0    0.0001103   4533.38477   47.01183
  4534.0    0.0001103   4533.90332   48.38528
  4536.0    0.0001102   4534.42188   49.85494
  4541.0    0.0001102   4534.94043   51.48018
  4542.0    0.0001102   4535.45898   53.28777
  4543.0    0.0001101   4535.97803   55.30849
  4550.0    0.0001101   4536.49658   57.55231
  4556.0    0.0001100   4537.01514   60.08617
  4558.0    0.0001099   4537.53369   62.90880
  4561.0    0.0001099   4538.05225   66.03130
  4567.0    0.0001098   4538.57080   69.41044
  4569.0    0.0001098   4539.08936   73.10926
  4571.0    0.0001098   4539.60791   77.05531
  4578.0    0.0001097   4540.12646   81.22081
  4586.0    0.0001096   4540.64502   85.49441
  4588.0    0.0001095   4541.16357   89.81302
  4593.0    0.0001095   4541.68213   94.08351
  4602.0    0.0001094   4542.20117   98.18871
  4605.0    0.0001093   4542.71973   102.00010
  4605.0    0.0001093   4543.23828   105.40121
  4612.0    0.0001092   4543.75684   108.30926
  4617.0    0.0001092   4544.27539   110.54417
  4617.0    0.0001091   4544.79395   112.05177
  4619.0    0.0001091   4545.31250   112.77899
  4623.0    0.0001091   4545.83105   112.67925
  4624.0    0.0001090   4546.34961   111.74733
  4619.0    0.0001091   4546.86816   110.00214
  4621.0    0.0001091   4547.38672   107.43748
  4621.0    0.0001091   4547.90527   104.33874
  4613.0    0.0001092   4548.42432   100.69009
  4607.0    0.0001092   4548.94287   96.59792
  4605.0    0.0001092   4549.46143   92.17016
  4601.0    0.0001093   4549.97998   87.51495
  4592.0    0.0001094   4550.49854   82.73467
  4590.0    0.0001094   4551.01709   77.92645
  4591.0    0.0001094   4551.53564   73.17916
  4584.0    0.0001095   4552.05420   68.57095
  4580.0    0.0001095   4552.57275   64.17656
  4579.0    0.0001095   4553.09131   60.04280
  4572.0    0.0001096   4553.61035   56.22336
  4567.0    0.0001096   4554.12891   52.76024
  4566.0    0.0001096   4554.64746   49.67964
  4565.0    0.0001096   4555.16602   47.00919
  4560.0    0.0001097   4555.68457   44.74510
  4559.0    0.0001097   4556.20313   42.90585
  4561.0    0.0001097   4556.72168   41.56989
  4559.0    0.0001097   4557.24023   40.69650
  4555.0    0.0001097   4557.60400   40.28617
  4559.0    0.0001097   4557.58301   40.33410
  4564.0    0.0001096   4557.56201   40.82938
  4560.0    0.0001097   4557.54102   41.75475
  4558.0    0.0001097   4557.52002   43.04779
  4566.0    0.0001096   4557.49902   44.75470
  4570.0    0.0001096   4557.47803   46.80879
  4567.0    0.0001096   4557.45703   49.14419
  4570.0    0.0001096   4557.43652   51.73911
  4574.0    0.0001095   4557.41553   54.49908
  4572.0    0.0001095   4557.39453   57.38105
  4576.0    0.0001095   4557.37354   60.31567
  4583.0    0.0001094   4557.35254   63.24647
  4584.0    0.0001094   4557.33154   66.10065
  4582.0    0.0001094   4557.31055   68.81003
  4587.0    0.0001094   4557.28955   71.30830
  4594.0    0.0001093   4557.26855   73.53330
  4592.0    0.0001093   4557.24756   75.42758
  4595.0    0.0001093   4557.22705   76.94553
  4602.0    0.0001092   4557.20605   78.07666
  4600.0    0.0001092   4557.18506   78.77027
  4596.0    0.0001093   4557.16406   79.04108
  4600.0    0.0001092   4557.14307   79.06255
  4605.0    0.0001091   4557.12207   78.58109
  4598.0    0.0001092   4557.10107   77.79684
  4593.0    0.0001093   4557.08008   76.72384
  4598.0    0.0001092   4557.05908   75.52176
  4599.0    0.0001092   4557.03809   74.21750
  4595.0    0.0001093   4557.01758   72.83524
  4599.0    0.0001092   4556.99658   71.45488
  4599.0    0.0001092   4556.97559   70.14677
  4590.0    0.0001093   4556.95459   68.86924
  4591.0    0.0001093   4556.93359   67.75863
  4599.0    0.0001092   4556.91260   66.75628
  4598.0    0.0001092   4556.89160   65.88721
  4594.0    0.0001093   4556.87061   65.15078
  4598.0    0.0001092   4556.84961   64.53982
  4601.0    0.0001092   4556.82910   64.04237
  4598.0    0.0001092   4556.80811   63.64375
  4599.0    0.0001092   4556.78711   63.32787
  4606.0    0.0001091   4556.76611   63.07851
  4605.0    0.0001091   4556.74512   62.87926
  4603.0    0.0001092   4556.72412   62.71338
  4606.0    0.0001091   4556.70313   62.55618
  4613.0    0.0001091   4556.68213   62.41161
  4608.0    0.0001091   4556.66113   62.23066
  4607.0    0.0001091   4556.64014   61.99426
  4615.0    0.0001090   4556.61963   61.68603
  4612.0    0.0001091   4556.59863   61.27182
  4609.0    0.0001091   4556.57764   60.72934
  4612.0    0.0001091   4556.55664   60.02554
  4614.0    0.0001090   4556.53564   59.14287
  4606.0    0.0001091   4556.51465   58.06572
  4606.0    0.0001091   4556.49365   56.78637
  4612.0    0.0001091   4556.47266   55.26504
  4610.0    0.0001091   4556.45166   53.59608
  4602.0    0.0001092   4556.43115   51.75801
  4600.0    0.0001092   4556.41016   49.77970
  4597.0    0.0001092   4556.38916   47.69676
  4588.0    0.0001094   4556.36816   45.55560
  4582.0    0.0001094   4556.34717   43.38932
  4584.0    0.0001094   4556.32617   41.25847
  4580.0    0.0001095   4556.30518   39.22061
  4570.0    0.0001096   4556.28418   37.25545
  4569.0    0.0001096   4556.26318   35.43807
  4572.0    0.0001095   4556.24219   33.80375
  4566.0    0.0001096   4556.22168   32.38379
  4562.0    0.0001097   4556.20068   31.20467
  4566.0    0.0001096   4556.17969   30.28813
  4559.0    0.0001097   4556.15869   29.65107
  4553.0    0.0001098   4556.13770   29.30521
  4557.0    0.0001097   4556.11670   29.28168
  4556.0    0.0001097   4556.09570   29.53320
  4550.0    0.0001098   4556.11670   30.08025
  4554.0    0.0001098   4556.15381   30.88033
  4556.0    0.0001097   4556.19141   31.98791
  4557.0    0.0001097   4556.22852   33.34527
  4556.0    0.0001097   4556.26611   34.81167
  4559.0    0.0001097   4556.30322   36.60863
  4560.0    0.0001097   4556.34033   38.57416
  4563.0    0.0001097   4556.37793   40.67117
  4567.0    0.0001096   4556.41504   42.85844
  4574.0    0.0001095   4556.45264   45.09089
  4572.0    0.0001095   4556.48975   47.32205
  4571.0    0.0001096   4556.52734   49.50319
  4574.0    0.0001095   4556.56445   51.58616
  4578.0    0.0001095   4556.60205   53.50631
  4577.0    0.0001095   4556.63916   55.26285
  4580.0    0.0001094   4556.67627   56.77937
  4583.0    0.0001094   4556.71387   58.02893
  4579.0    0.0001095   4556.75098   59.01759
  4578.0    0.0001095   4556.78857   59.64742
  4585.0    0.0001094   4556.82568   59.94122
  4582.0    0.0001094   4556.86328   59.88950
  4575.0    0.0001095   4556.90039   59.49051
  4578.0    0.0001095   4556.93799   58.76232
  4576.0    0.0001095   4556.97510   57.72204
  4572.0    0.0001095   4557.01221   56.40017
  4572.0    0.0001095   4557.04980   54.83534
  4574.0    0.0001095   4557.08691   53.07651
  4570.0    0.0001096   4557.12451   51.16621
  4566.0    0.0001096   4557.16162   49.16091
  4566.0    0.0001096   4557.19922   47.11515
  4568.0    0.0001096   4557.23633   45.07957
  4566.0    0.0001096   4557.27393   43.10674
  4562.0    0.0001097   4557.31104   41.24473
  4563.0    0.0001096   4557.34814   39.53891
  4560.0    0.0001097   4557.38574   38.03029
  4560.0    0.0001097   4557.42285   36.75656
  4562.0    0.0001097   4557.46045   35.75152
  4563.0    0.0001096   4557.49756   35.02617
  4559.0    0.0001097   4557.53516   34.64647
  4563.0    0.0001096   4557.57227   34.61691
  4563.0    0.0001096   4557.60986   34.95898
  4563.0    0.0001096   4557.71191   35.69170
  4556.0    0.0001097   4557.81396   36.84694
  4561.0    0.0001097   4557.91650   38.40866
  4560.0    0.0001097   4558.01855   40.40305
  4566.0    0.0001096   4558.12109   42.83957
  4569.0    0.0001096   4558.22363   45.72322
  4572.0    0.0001095   4558.32568   48.94219
  4567.0    0.0001096   4558.42822   52.72304
  4570.0    0.0001095   4558.53027   56.94057
  4576.0    0.0001095   4558.63281   61.58118
  4583.0    0.0001094   4558.73486   66.62513
  4586.0    0.0001094   4558.83740   72.04508
  4588.0    0.0001093   4558.93994   77.80421
  4593.0    0.0001093   4559.04199   83.86723
  4595.0    0.0001092   4559.14453   90.17858
  4602.0    0.0001092   4559.24658   96.68512
  4610.0    0.0001091   4559.34912   103.34860
  4614.0    0.0001090   4559.45166   110.04739
  4616.0    0.0001090   4559.55371   116.72465
  4628.0    0.0001088   4559.65625   123.32210
  4635.0    0.0001088   4559.75830   129.70522
  4639.0    0.0001087   4559.86084   135.79337
  4641.0    0.0001087   4559.96338   141.51846
  4650.0    0.0001086   4560.06543   146.67770
  4653.0    0.0001085   4560.16797   151.25331
  4660.0    0.0001085   4560.27002   155.08484
  4663.0    0.0001084   4560.37256   158.14471
  4664.0    0.0001084   4560.47510   160.32216
  4659.0    0.0001085   4560.57715   161.55862
  4661.0    0.0001084   4560.67969   161.81924
  4660.0    0.0001084   4560.78174   161.09547
  4660.0    0.0001084   4560.88428   159.40593
  4654.0    0.0001085   4560.98682   156.79448
  4650.0    0.0001086   4561.08887   153.32822
  4636.0    0.0001087   4561.19141   149.09341
  4632.0    0.0001088   4561.29346   144.19995
  4625.0    0.0001089   4561.39600   138.72502
  4620.0    0.0001089   4561.49854   132.82214
  4606.0    0.0001091   4561.60059   126.61250
  4605.0    0.0001091   4561.70313   120.17030
  4601.0    0.0001091   4561.80518   113.65578
  4597.0    0.0001092   4561.90771   107.12591
  4587.0    0.0001093   4562.01025   100.76582
  4585.0    0.0001093   4562.11230   94.62968
  4578.0    0.0001094   4562.21484   88.80372
  4576.0    0.0001094   4562.31689   83.35871
  4573.0    0.0001095   4562.41943   78.35599
  4573.0    0.0001095   4562.52197   73.84179
  4564.0    0.0001096   4562.62402   69.84969
  4563.0    0.0001096   4562.72656   66.40144
  4563.0    0.0001096   4561.95459   63.50778
  4565.0    0.0001096   4560.76172   61.16602
  4564.0    0.0001096   4559.56885   59.37909
  4566.0    0.0001096   4558.37598   58.10207
  4564.0    0.0001096   4557.18311   57.33768
  4562.0    0.0001097   4555.98975   57.01856
  4565.0    0.0001096   4554.79688   57.12189
  4569.0    0.0001096   4553.60400   57.60310
  4566.0    0.0001097   4552.41113   58.41344
  4566.0    0.0001097   4551.21826   59.50056
  4570.0    0.0001096   4550.02490   60.80974
  4573.0    0.0001096   4548.83203   62.28429
  4572.0    0.0001097   4547.63916   63.86654
  4573.0    0.0001097   4546.44629   65.50967
  4574.0    0.0001097   4545.25293   67.13759
  4574.0    0.0001097   4544.06006   68.70790
  4580.0    0.0001096   4542.86719   70.18003
  4584.0    0.0001096   4541.67432   71.49748
  4583.0    0.0001096   4540.48145   72.63391
  4579.0    0.0001097   4539.28809   73.57711
  4580.0    0.0001097   4538.09521   74.28825
  4584.0    0.0001096   4536.90234   74.77424
  4586.0    0.0001096   4535.70947   75.03875
  4582.0    0.0001097   4534.51660   75.09423
  4580.0    0.0001097   4533.32324   74.95609
  4577.0    0.0001098   4532.13037   74.65829
  4576.0    0.0001098   4530.93750   74.20845
  4579.0    0.0001098   4529.74463   73.63689
  4579.0    0.0001098   4528.55127   72.97573
  4571.0    0.0001099   4527.35840   72.25334
  4572.0    0.0001099   4526.16553   71.49703
  4567.0    0.0001100   4524.97266   70.73242
  4564.0    0.0001100   4523.77979   69.98655
  4559.0    0.0001101   4522.58643   69.26978
  4558.0    0.0001101   4521.39355   68.60003
  4553.0    0.0001102   4520.20068   67.98723
  4550.0    0.0001103   4519.00781   67.43567
  4545.0    0.0001103   4517.81494   66.95007
  4546.0    0.0001103   4516.62158   66.51147
  4538.0    0.0001105   4515.42871   66.11626
  4534.0    0.0001105   4514.23584   65.74322
  4533.0    0.0001105   4513.04297   65.37414
  4531.0    0.0001106   4511.84961   64.98593
  4522.0    0.0001107   4510.65674   64.52834
  4523.0    0.0001107   4509.46387   64.02824
  4519.0    0.0001108   4508.27100   63.43665
  4516.0    0.0001108   4507.07813   62.73372
  4513.0    0.0001109   4505.88477   61.89669
  4515.0    0.0001109   4504.69189   60.92963
  4508.0    0.0001110   4503.49902   59.82143
  4506.0    0.0001110   4502.30566   58.53551
  4503.0    0.0001111   4501.11328   57.15988
  4500.0    0.0001111   4499.91992   55.66957
  4495.0    0.0001112   4498.72705   54.09150
  4495.0    0.0001112   4497.53418   52.42516
  4492.0    0.0001113   4496.34082   50.72305
  4489.0    0.0001113   4495.14795   49.00635
  4487.0    0.0001113   4493.95508   47.30602
  4486.0    0.0001114   4492.76221   45.65290
  4483.0    0.0001114   4491.56934   44.07729
  4480.0    0.0001115   4490.37646   42.60912
  4477.0    0.0001115   4489.18311   41.27379
  4473.0    0.0001116   4487.99023   40.09639
  4469.0    0.0001117   4486.79736   39.10434
  4470.0    0.0001117   4485.60449   38.30425
  4469.0    0.0001117   4484.41162   37.71218
  4466.0    0.0001117   4483.21826   37.33977
  4467.0    0.0001117   4482.02539   37.18732
  4469.0    0.0001117   4480.83252   37.26771
  4465.0    0.0001118   4479.63965   37.58873
  4464.0    0.0001118   4478.44678   38.10886
  4465.0    0.0001118   4477.25342   38.84156
  4464.0    0.0001119   4476.06055   39.77210
  4462.0    0.0001119   4474.86768   40.88589
  4464.0    0.0001119   4473.67432   42.16645
  4465.0    0.0001119   4472.48145   43.59907
  4465.0    0.0001119   4471.28857   45.15411
  4466.0    0.0001119   4470.09570   46.81296
  4467.0    0.0001119   4468.90234   48.55077
  4466.0    0.0001119   4467.70947   50.34088
  4465.0    0.0001120   4466.51660   52.15755
  4466.0   .            .            .
_pd_meas_number_of_points              1222
_pd_proc_number_of_points              1222

loop_
      _refln_index_h
      _refln_index_k
      _refln_index_l
      _refln_observed_status
      _refln_F_squared_meas
      _refln_F_squared_calc
      _refln_phase_calc
      _refln_d_spacing
      _gsas_i100_meas
   1   0   1 o  1202.604   1335.354    0.00    6.86907  33.97 
   1   1   0 o  68.949     96.705      0.00    6.66338   0.92 
   0   0   2 o  15.936     81.606     180.00   5.01697   0.06 
   2   0   0 o  15106.481  15081.589  180.00   4.71172  100.00
   1   0   2 o  218.553    351.857   -90.00    4.42847   2.55 
   2   0   1 o  508.799    467.843    90.00    4.26491   5.51 
   2   1   0 o  3986.944   3798.098  -180.00   4.21429  42.15 
   1   1   2 o  1350.160   1311.973   86.47    4.00796  12.90 
   2   1   1 o  1499.023   1521.990  -111.86   3.88550  26.90 
   2   0   2 o   1.531      6.003      0.00    3.43454   0.01 
   2   2   0 o  230.447    258.978     0.00    3.33169   0.76 
   2   1   2 o  281.893    440.768    88.55    3.22689   3.47 
   1   0   3 o  3868.419   4438.161  -180.00   3.15200  22.71 
   3   0   1 o  1256.446   1653.555  -180.00   2.99769   6.66 
   3   1   0 o  521.444    703.820   -180.00   2.97996   2.73 
   3   1   1 o  718.767    962.384    160.15   2.85664   6.91 
   2   2   2 o  4376.395   4083.845  -93.23    2.77544  19.83 
   2   0   3 o  2382.560   2531.923   90.00    2.72735  10.41 
   3   0   2 o   3.258      3.438     90.00    2.66237   0.01 
   2   1   3 o  8384.685   8246.401  -64.88    2.61983  67.51 
   3   2   0 o  1129.440   1128.146  -180.00   2.61359   4.52 
   3   1   2 o  65.160     74.636    -106.51   2.56208   0.50 
   3   2   1 o  115.590    118.905    20.66    2.52920   0.87 
   0   0   4 o  46096.46   43199.04   180.00   2.50849  42.44 
   1   0   4 o   0.742      2.012    -90.00    2.42407   0.00 
   4   0   0 o  3523.989   3944.782  -180.00   2.35586   5.70 
   1   1   4 o  93.987     99.799    -110.93   2.34764   0.30 
   3   2   2 o  2607.378   2409.036   86.25    2.31792  16.32 
   4   0   1 o  1617.490   1428.420  -90.00    2.29349   4.95 
   3   0   3 o  2903.471   2556.249    0.00    2.28969   8.86 
   4   1   0 o  3140.253   2756.986  -180.00   2.28552   9.55 
   2   0   4 o  6017.780   5531.896    0.00    2.21423  17.14 
   4   1   1 o  281.213    242.442    102.23   2.22844   1.62 
   3   1   3 o  2383.870   2075.992    1.40    2.22495  13.72 
   3   3   0 o  5664.220   5007.403    0.00    2.22113   8.12 
   2   1   4 o  703.674    1329.500   -0.40    2.15553   3.79 
   4   0   2 o   0.233      0.553      0.00    2.13246   0.00 
   4   2   0 o  710.812    1002.261    0.00    2.10715   1.83 
   4   1   2 o  542.015    468.389   -75.10    2.07987   2.71 
   4   2   1 o  1142.680   930.314    152.48   2.06217   5.62 
   3   2   3 o  1417.927   1159.695   169.16   2.05940   6.95 
   3   3   2 o  510.094    504.780    80.63    2.03099   1.21 
   2   2   4 o  95.757     173.462   -139.66   2.00398   0.22 
   1   0   5 o  157.048    155.087    180.00   1.96278   0.35 
   3   0   4 o  180.663    166.077    90.00    1.96015   0.40 
   4   2   2 o  267.771    194.122    90.97    1.94275   1.16 
   4   0   3 o  2647.888   1981.720  -90.00    1.92604   5.64 
   3   1   4 o  310.790    242.612   -18.28    1.91907   1.31 
   4   1   3 o  600.199    587.385    73.67    1.88703   2.45 
   4   3   0 o  148.127    149.537     0.00    1.88469   0.30 
   4   3   1 o  135.918    207.597    64.00    1.85230   0.53 
   5   0   1 o   1.278      1.952     180.00   1.85230   0.00 
   5   1   0 o   3.421      4.921      0.00    1.84809   0.01 
   2   0   5 o  27.128     37.679    -90.00    1.84630   0.05 
   5   1   1 o  152.879    114.113   -43.39    1.81752   0.58 
   2   1   5 o  203.057    143.959    101.45   1.81185   0.76 
   3   2   4 o  838.463    587.057    -2.01    1.80979   3.14 
   4   2   3 o  1239.330   857.006    63.86    1.78283   4.49 
   5   0   2 o  113.704    86.509    -90.00    1.76430   0.20 
   4   3   2 o  934.921    711.314    86.15    1.76430   3.32 
   5   2   0 o  198.850    200.592     0.00    1.74989   0.35 
   5   1   2 o   1.227      2.475     112.61   1.73417   0.00 
   5   2   1 o  68.461     255.230    -2.89    1.72387   0.23 
   4   0   4 o  199.826    998.861     0.00    1.71727   0.33 
   3   0   5 o  161.992    578.803     0.00    1.69113   0.26 
   4   1   4 o  419.864    1462.434    3.11    1.68945   1.36 
   0   0   6 o   0.021      0.067     180.00   1.67232   0.00 
   4   4   0 o  14.762     51.082     180.00   1.66585   0.01 
   3   1   5 o  90.432     317.882   -69.58    1.66454   0.28 
   3   3   4 o  345.795    1240.996  -171.54   1.66293   0.54 
   5   2   2 o  129.775    526.348   -91.26    1.65227   0.40 
   1   0   6 o  48.594     191.565   -90.00    1.64660   0.07 
   4   3   3 o  16.851     59.685     140.18   1.64195   0.05 
   5   0   3 o   8.059     28.544      0.00    1.64195   0.01 
   1   1   6 o  732.342    1356.697   105.28   1.62202   1.09 
   5   1   3 o  115.989    204.926   -143.82   1.61758   0.34 
   5   3   0 o  217.403    382.598   -180.00   1.61611   0.32 
   4   2   4 o  322.991    572.940    178.24   1.61345   0.95 
   5   3   1 o  34.089     99.066     137.53   1.59554   0.10 
   3   2   5 o  19.479     66.033     29.71    1.59171   0.06 
   4   4   2 o  308.053    1251.679   84.85    1.58097   0.43 
   2   0   6 o   3.595     13.140     180.00   1.57600   0.01 
   6   0   0 o  310.770    941.536     0.00    1.57057   0.22 
   2   1   6 o  280.076    552.656   -87.63    1.55441   0.76 
   6   0   1 o  72.303     139.291    90.00    1.55168   0.10 
   5   2   3 o  302.903    580.375    109.17   1.55050   0.82 
   6   1   0 o  1672.667   3196.635    0.00    1.54921   2.25 
   5   3   2 o  149.919    323.841   -101.52   1.53827   0.40 
   6   1   1 o   9.793     25.911     127.11   1.53106   0.03 
   4   0   5 o  263.210    777.523    90.00    1.52767   0.34 
   4   1   5 o  21.643     67.954    -77.67    1.50799   0.05 
   4   3   4 o  33.253     100.971    145.15   1.50679   0.08 
   5   0   4 o  101.766    309.005   -90.00    1.50679   0.13 
   6   0   2 o   2.746      6.640      0.00    1.49885   0.00 
   2   2   6 o  1769.236   3851.907   86.99    1.49461   2.20 
   6   2   0 o   2.700      5.332      0.00    1.48998   0.00 
   5   1   4 o  20.760     39.423     135.62   1.48789   0.05 
   6   1   2 o  37.191     62.033     145.14   1.48024   0.09 
   3   0   6 o  18.766     29.384     90.00    1.47616   0.02 
   6   2   1 o  311.487    471.632    -7.99    1.47382   0.75 
   5   4   0 o  758.246    1116.461  -180.00   1.47170   0.91 
   3   1   6 o  181.919    253.495    53.88    1.45837   0.43 
   5   4   1 o  96.546     137.681   -137.40   1.45612   0.23 
   5   3   3 o  251.235    363.266    55.89    1.45514   0.59 
   4   2   5 o  477.464    714.889   -23.52    1.45320   1.12 
   6   0   3 o  15.242     60.014    -90.00    1.42164   0.02 
   1   0   7 o  326.945    1224.192    0.00    1.41712   0.36 
   5   2   4 o  35.652     111.440    153.21   1.43519   0.08 
   5   4   2 o  53.462     194.142    75.24    1.41219   0.12 
   3   2   6 o  275.382    1011.548  -89.06    1.40864   0.60 
   6   2   2 o  19.943     78.246    -91.55    1.42832   0.05 
   6   1   3 o  50.109     189.907    147.11   1.40573   0.11 
   6   3   0 o  118.753    456.440   -180.00   1.40476   0.13 
   6   3   1 o  32.487     148.802   -30.71    1.39120   0.07 
   4   4   4 o  37.270     163.688    42.61    1.38772   0.04 
   4   3   5 o  109.668    299.050   -112.64   1.37381   0.23 
   5   0   5 o   1.931      5.267     180.00   1.37381   0.00 
   2   0   7 o  607.450    1531.728  -90.00    1.37136   0.63 
   4   0   6 o  22.946     49.718      0.00    1.36368   0.02 
   6   2   3 o  297.071    634.967   -169.91   1.36103   0.60 
   5   1   5 o  97.617     209.053    111.95   1.35944   0.20 
   5   3   4 o  44.273     95.225     33.15    1.35857   0.09 
   2   1   7 o  2075.947   4522.482   116.12   1.35707   4.19 
   6   3   2 o  138.405    324.475    85.31    1.35274   0.28 
   4   1   6 o  152.776    388.762    104.41   1.34962   0.30 
   5   4   3 o  199.826    550.635   -64.68    1.34706   0.40 
   3   3   6 o  176.903    625.149   -120.05   1.33599   0.17 
   7   0   1 o   1.402      4.911      0.00    1.33425   0.00 
   7   1   0 o  19.628     67.299      0.00    1.33268   0.02 
   5   5   0 o   0.201      0.691    -180.00   1.33268   0.00 
   6   0   4 o  71.768     238.552    180.00   1.33118   0.07 
   7   1   1 o  65.456     159.740   -16.10    1.32108   0.12 
   5   2   5 o  164.315    380.214    130.55   1.31890   0.31 
   6   1   4 o  735.818    1675.195  -172.04   1.31810   1.39 
   4   2   6 o  363.254    791.904   -93.50    1.30992   0.68 
   6   4   0 o  28.263     64.889    -180.00   1.30680   0.03 
   3   0   7 o  327.852    816.960   -180.00   1.30406   0.30 
   7   0   2 o   2.801      8.382     90.00    1.30021   0.00 
   6   4   1 o  22.369     93.884    -167.68   1.29585   0.04 
   6   3   3 o  18.798     84.726    -38.27    1.29517   0.03 
   7   2   0 o  86.506     424.957     0.00    1.29441   0.08 
   3   1   7 o  169.311    1229.082  -176.25   1.29175   0.31 
   5   5   2 o   3.332     72.694     21.44    1.28801   0.00 
   7   1   2 o  30.563     666.715    85.04    1.28801   0.06 
   7   2   1 o   0.000     121.429    173.55   1.28377   0.00 
   6   2   4 o   0.000     43.777     135.40   1.28104   0.00 
   5   4   4 o   0.000     533.907    17.19    1.26936   0.00 
   6   4   2 o   0.000     37.754    -104.03   1.26460   0.00 
_reflns_number_total                   148
_reflns_limit_h_min                    0
_reflns_limit_h_max                    8
_reflns_limit_k_min                    0
_reflns_limit_k_max                    5
_reflns_limit_l_min                    0
_reflns_limit_l_max                    8
_reflns_d_resolution_high              1.265
_reflns_d_resolution_low               6.869
#--eof--eof--eof--eof--eof--eof--eof--eof--eof--eof--eof--eof--eof--eof--eof--#
